# Hydraulic conductance and the maintenance of water balance in flowers

**Adam B. Roddy<sup>1,2</sup> and Todd E. Dawson<sup>1</sup>**

<sup>1</sup>Department of Integrative Biology, University of California, Berkeley, CA, USA

<sup>2</sup>Present address: School of Forestry & Environmental Studies, Yale University, New Haven, CT, USA

## **Author of contact:**

Adam B. Roddy

email: [adam.rodny@yale.edu](mailto:adam.rodny@yale.edu)

phone: +1 510.224.4432

# Abstract

The production and maintenance of flowers is critical for successful reproduction in the angiosperms, yet we know little about how flowers remain hydrated under desiccating conditions. Here we quantify the variability in floral hydraulic conductance ( $K_{flower}$ ) for a phylogenetically diverse set of 17 species from 10 angiosperm families and relate the variability in  $K_{flower}$  to traits associated with the liquid phase transport of water into and through flowers and traits associated with the vapor phase diffusion of water vapor from floral surfaces. We found that  $K_{flower}$  was coordinated with traits associated with water supply (vein length per area,  $VLA$ ) and loss (minimum epidermal conductance,  $g_{min}$ ), particularly among the magnoliids. Among the monocots and eudicots,  $K_{flower}$  was largely insensitive to variation in  $VLA$ , suggesting that the low  $VLA$  of these species may require them to rely on other mechanisms of maintaining turgor than continuous supply of water by the xylem.  $K_{flower}$  varied considerably among species, and its reduction among the monocots and eudicots may have relaxed physiological constraints on flowers and allowed floral morphological traits to be more efficiently molded by pollinator selection in these clades.

**Key words:** angiosperms, flower, hydraulic conductance, vein density, water balance

## Introduction

The primary function of flowers in most angiosperms is to promote sexual reproduction by either attracting animal pollinators or promoting pollen dispersal by wind or water. Animal pollinators have long been thought to be one of the most important agents of selection on flowers (Sprengel 1793; Darwin 1888), and numerous studies have shown that among narrowly defined groups, pollinator selection can influence a variety of morphological traits, such as color, size, and shape (Galen 2000; Bradshaw & Schemske 2003; Whittall & Hodges 2007; Hopkins & Rausher 2012). However, flowers are subject to the same biophysical constraints of resource supply and demand as other plant structures. These non-pollinator agents of selection, though rarely studied, can also exert selective pressures on floral traits, often in opposition to the preferences of pollinators (Strauss & Whittall, 2006). For example, pollinators generally prefer larger, more showy flowers, but larger flowers have higher water requirements that can exact physiological costs on the rest of the plant (Galen et al. 1999; Lambrecht & Dawson 2007; Lambrecht 2013). Flowers of many species are often located in the hottest, driest parts of the plant canopy, which can influence the amount of water they require throughout the day (Roddy & Dawson 2012). Knowing how flowers remain turgid and attractive to pollinators is fundamental to understanding their structure, function, and evolution.

Compared to other structures, such as leaves and stems (Feild et al. 2009; Pittermann 2010), the hydraulic architecture of flowers has received little attention. Presuming that water influx and efflux must be in balance over some time scale, the mass balance of flower water can be defined as:

$$\Delta W = J - E \quad (\text{eqn 1})$$

where  $W$  is the water content, and  $J$  and  $E$  the rates of water supply and loss, respectively. If mass balance of water is to be maintained, then  $\Delta W = 0$ , and  $J$  must equal  $E$ . Various factors can influence these rates of water loss from and water supply to flowers. Water can be transpired from flowers via stomata or evaporate through the cuticle from epidermal cells. The relative contributions of these two pathways to the total transpirational flux are unknown and may vary among species. In some taxa, flowers are unable to regulate epidermal conductances to water vapor (Hew et al. 1980; Teixido & Valladares 2014), while in other species stomata remain capable of opening and closing (Azad et al. 2007; Feild et al. 2009). Whether or not transpiration is regulated by stomata, maintaining high rates of floral transpiration would require that flowers have constant, ample supplies of water. The most efficient way of providing large amounts of water to flowers

would be via the xylem, the tissue predominantly used for transporting water throughout the plant. Flowers of some early-diverging, ‘basal’ angiosperms and magnoliids (the genera *Illicium* (Schisandraceae) and *Magnolia* (Magnoliaceae)) have been shown to have water potentials more negative than the stem, indicating that they are hydraulically connected to the stem xylem (Feild et al. 2009; Feild et al. 2009). In contrast, some eudicot flowers and petals tend to have higher, less negative water potentials than subtending bracts and leaves (Trolinder et al. 1993; Chapotin et al. 2003). These ‘reverse’ water potential gradients imply that for flowers to remain hydrated, water must be imported against an apoplastic water potential gradient in the xylem. This could be performed by the phloem, which is primarily responsible for the transport of photosynthates throughout the plant. In contrast to the xylem, the phloem has much higher hydraulic resistance and lower water flux rates because phloem transport occurs symplastically (Münch 1930; Nobel 1983; Windt et al. 2009). Relying on phloem-delivered water instead of xylem-delivered water would mean that  $J$  in eqn 1 would probably be lower, and in order to keep  $\Delta W = 0$ , then  $E$  must also be lower. In other words, to maintain a constant water content,  $J$  and  $E$  must be coordinated such that reductions in water supply associated with a possible switch to phloem-hydration would be accompanied by reductions in water loss.

The dichotomy between xylem- and possibly phloem-hydrated flowers leads to the prediction that there may be substantial variation in the xylem hydraulic conductance of flowers ( $K_{flower}$ ). Indeed, the xylem in some taxa may not be continuous from pedicel to petal, and the point of discontinuity could be a source of high resistance to apoplastic water flow (Lersten & Wemple 1966). If flowers are hydrated by the phloem, then we would expect the xylem pathway to be occluded or otherwise nonfunctional to prevent backflow of water to the stem, which would result in a lowered  $K_{flower}$ . Low values of  $K_{flower}$  could be associated with lower rates of water loss ( $E$ ), which would mitigate the need for maintaining a high hydraulic supply capacity ( $J$ ). Thus, coordinated changes in water supply and water loss should correlate with changes in  $K_{flower}$ , and the phloem may be capable of supplying enough water to flowers to maintain water balance if  $E$  is sufficiently low. Regardless of whether the phloem is involved in supplying significant amounts of water to flowers, there may nonetheless be significant variation in xylem hydraulic conductance among flowers which may correspond to other traits associated with water supply and loss.

By comparison, leaf hydraulic conductance ( $K_{leaf}$ ) is highly variable among species and influenced by both environmental conditions and anatomical traits (Sack et al. 2003; Brodribb & Jordan 2011). Maintaining water balance within thresholds that prevent significant dehydration

requires coordination between traits associated with water supply and traits associated with water loss. In leaves, a few important traits have been shown to be critical in maintaining water balance (Boyce et al. 2009; Brodribb et al. 2013). In terms of water supply, vein length per area ( $VLA$ ; or vein density) is one of the major traits controlling leaf hydraulic conductance (Sack & Frolle 2006; Brodribb et al. 2007; Brodribb & Jordan 2011). Leaves with higher  $VLA$  can deliver liquid water closer to the sites of evaporation in the leaf to prevent desiccation of the photosynthetic tissues during  $CO_2$  exchange with the atmosphere. By increasing the supply of water closer to the sites of evaporation, leaves can maintain higher stomatal conductances and photosynthetic rates. Furthermore,  $VLA$  has been shown to be a critical determinant of leaf hydraulic supply capacity across diverse land plant lineages and increased dramatically during angiosperm evolution (Brodribb et al. 2007; Boyce et al. 2009; Brodribb & Feild 2010; Feild et al. 2011; Feild et al. 2011). In terms of water loss from leaves, maximum stomatal conductance is tightly coordinated with stomatal size and density, all of which are coordinated with hydraulic conductance of the leaf lamina (Sack et al. 2003; Brodribb et al. 2013). However, flowers generally have few stomata, which would mean that cuticular leakiness may have a larger effect on flower water loss than stomata.

In the present study, we measured whole flower hydraulic conductance ( $K_{flower}$ ) for 17 species, including one previously published species, from 10 angiosperm families that included the magnoliids, monocots, and the eudicots. We sought to determine the variability of  $K_{flower}$  among species and the anatomical and physiological traits associated with this variation. In addition to  $VLA$  and stomatal traits, we also measured the Huber ratio (ratio of xylem cross-sectional area to evaporative surface area) and the minimum epidermal conductance to water vapor under non-transpiring conditions ( $g_{min}$ ). We made four predictions about the hydraulic efficiency and maintenance of water balance in flowers. First, we predicted that there would be positive correlations between water supply traits and water loss traits. Positive correlations between traits in these two suites would suggest that these traits are involved in synchronizing the liquid phase transport of water into flowers and the regulation of vapor phase water losses from flowers. Further, such positive correlations would support the hypothesis that the constraints of maintaining water balance have required coordinated changes in water supply and water loss. Second, we predicted that there would be positive correlations among traits within the two suites of traits. As a result, we predicted that  $K_{flower}$  would correlate with both water supply and water loss traits. Coordination between  $K_{flower}$  and water balance traits would provide strong support that these traits are mechanistically related to the hydraulic capacity of flowers.

# Materials and Methods

## *Plant material*

We collected flowering shoots from around the University of California, Berkeley, campus and from the University of California Botanic Garden during the springs of 2013 and 2014. All plants had been kept well-watered. We chose a phylogenetically diverse set of species that varied by almost two orders of magnitude in floral display size (Table 1). These species also varied morphologically, from flowers with undifferentiated perianths to those with a fully differentiated calyx and corolla and from those with free petals to those with sympetalous connation. Additionally, we included inflorescences of *Cornus florida* (Cornaceae), which have small, inconspicuous flowers but large, white bracts as their showy organs. Although the showy floral structures of this set of species are not homologous, they all serve the same function, namely pollinator attraction. For each species, we measured  $K_{flower}$  on at least three flowers, and most species had low variance among individual flowers. Sample sizes for each species are shown in Table 1.

## *Measurements of hydraulic conductance*

We used a low pressure flow meter to measure hydraulic conductance of whole flowers and developing flower buds (Kolb et al. 1996). This method has been shown to be insensitive to variation in irradiance and measures the capacity for water transport into the leaf or flower (Sack et al. 2002). We chose this method rather than the evaporative flux method because the evaporative flux method depends on maximizing boundary layer conductance. Because of the morphological complexities of flowers (i.e. unlike leaves, flowers are rarely planar), we were not confident we could maximize the boundary layer conductance to obtain realistic maximum values of  $K_{flower}$ . However, the low pressure flow meter has the potential to clear any xylem occlusion. We tested this on a subset of species by (1) comparing flow rates when increasing the vacuum pressure to flow rates measured when decreasing the vacuum pressure and (2) by repeatedly measuring the same flower. We found no differences between flow rates measured while increasing the vacuum or while decreasing the vacuum and no significant increase in  $K_{flower}$  with subsequent measurements (data not shown).

Flowering shoots were excised early in the morning (before 9:00 am) when stem water potentials of plants growing in this area are generally higher than -0.25 MPa. Cut shoots were

immediately recut under distilled water at least one node apical to the first cut and transported back to the lab in a covered bucket to minimize water loss. Shoots were kept in water in the covered bucket for at least one hour during transport and after returning to the lab before any flowers were excised, allowing for relaxation of xylem tension. We only measured the most recently opened flowers on each plant, based on each flower's development relative to other flowers on the plant. Once in the lab, individual flowers were excised underwater at the pedicel base and connected to hard-walled tubing that led back to an electronic balance (Sartorius CPA225, Sartorius, Goettingen, Germany), on which sat a vial of dilute electrolyte solution (10 mM KCl, filtered to 0.2  $\mu$ m and degassed the morning of measurements). Flowers were placed in a cylindrical acrylic chamber that was attached to a vacuum pump and lined with wet paper towels. Flow rates of KCl solution into the leaf or flower from the balance were measured every 10-60 seconds depending on the absolute flow rate under 5-6 different pressures ranging from 15 to 60 kPa below ambient. At each pressure, flow rates were allowed to stabilize for 3-20 minutes and until the coefficient of variation of the last ten readings was, ideally, less than 5% and the instantaneous measurements converged on the average of the last ten measurements. In practice, low absolute flow rates meant that stable averages could be reached but the coefficient of variation often remained above 5%. To determine  $K_{flower}$ , we linearly regressed the flow rates versus pressure and removed, at most, one outlying point from the regression. Immediately after measurements, we scanned the flowers to determine the one-sided projected surface area of all perianth parts, which we used to normalize hydraulic conductance to calculate  $K_{flower}$  in units of  $\text{mmol s}^{-1} \text{m}^{-2} \text{MPa}^{-1}$ . For comparison of measurements made using the low pressure flow meter to measurements made using other methods, values of  $K_{flower}$  for *Magnolia grandiflora* reported by Feild et al. (2009b) using a different method were approximately equivalent to values produced using our method for congeneric species, and maximum measurements of  $K_{flower}$  in the field based on Darcy's Law for *Cahycanthus occidentalis* approached those measured using the low pressure flow meter (data not shown).

To compare our measured values of  $K_{flower}$  to values of  $K_{leaf}$  we compiled data from a variety of papers that reported  $K_{leaf}$  for both temperate (Nardini & Salleo 2000; Sack et al. 2002; Nardini et al. 2005; Gullo et al. 2005; Scoffoni et al. 2008) and tropical (Sack & Frole 2006) plants.

### *Trait measurements*

The Huber ratio is the ratio of the xylem cross-sectional area to the evaporative surface area. In the laboratory, pedicels of the flowers measured for  $K_{flower}$  were sliced underwater using a sharp



razor blade. The sections were placed in distilled H<sub>2</sub>O, while floral structures (tepals, petals, sepals) were individually removed and scanned on a flatbed scanner. The pedicel cross-sections were quickly stained with phloroglucinol and imaged at 5-40x under a compound microscope outfitted with a digital camera. We measured the xylem cross-sectional area and the surface area of flowers using ImageJ (version 1.44o; Rasband 2012). We did not measure the area of individual xylem conduits, but instead quantified the amount of cross-sectional area that was occupied by xylem.

For flowers that had differentiated perianths, we made trait measurements only on the corolla because the petals comprised the largest evaporative surface area. Sampling for vein density was identical to Roddy et al. (2013) and briefly summarized here. To account for the high variability in vein density within a petal, we excised multiple 1-cm<sup>2</sup> pieces from petals of multiple flowers. These sections were placed in 2% NaOH for clearing. Sections were rinsed briefly in distilled H<sub>2</sub>O and then placed in 95% ethanol. Once in ethanol, samples were briefly stained with Safranin O and imaged at 5-20x magnification under a compound microscope outfitted with a digital camera. One or two images per section from each of five to twelve sections per species were captured, and vein densities were measured using Image J (version 1.44o; Rasband 2012).

The minimum epidermal conductance,  $g_{min}$ , is the area-normalized conductance to water vapor in the dark, after stomata have been allowed to close (Kerstiens 1996). We measured  $g_{min}$  on individual petals or tepals by sealing the cut edges with a thick layer of petroleum jelly and placing the structures in a dark box into which was placed a fan and a temperature and relative humidity sensor. For connate flowers, we measured the entire tubular structure and sealed the cut base with petroleum jelly. Structures sat on a mesh screen while the fan pulled air across the flowers inside the container. Every 5 to 20 minutes, the container was briefly opened and the structure weighed on a balance with a resolution of 0.1 mg. A regression of the linear part of this resulting curve was used to calculate  $g_{min}$ . After approximately 10 measurements, each structure was scanned to measure its area and then placed in a drying oven for later dry mass measurement.

We used two methods to measure stomatal traits, stomatal density and guard cell length. First, we cleared sections in 2% NaOH, rinsed them briefly in distilled H<sub>2</sub>O, and transferred them into 95% EtOH. Images of the epidermis were made using a compound microscope at 5-40x. We imaged 5-20 fields of view to determine stomatal densities, depending on the abundance of stomata. We also made stomatal impressions using dental putty (Coltene Whaledent President Light Body). Nail varnish impressions of the dental putty were then imaged with a compound microscope. Guard cell length was determined by measuring the maximum length of at least 10 guard cells for



each species with stomata. The stomatal pore area index (SPI) was calculated as the product of stomatal density and the square of average guard cell length, according to Sack et al. (2003a).

We lacked some trait data for some species but, because of the paucity of  $K_{flower}$  measurements, we have chosen to include these species in the present analyses when possible. Data for *Magnolia grandiflora* were taken from Feild (Feild et al. 2009) and so lacked many of the traits we measured. There are no anatomical or structural traits for *Magnolia doltsopa*, so mean  $K_{flower}$  for this species occurs only in Table 1.

### Statistical analyses

For correlations between traits and between traits and  $K_{flower}$ , we tested whether there was a significant correlation between variables using the conservative non-parametric Spearman rank correlation. We compared linear, logarithmic, power, and quadratic fits and chose the model with the lowest root mean square error (RMSE). Because calculating  $R^2$  values from nonlinear fits is statistically inappropriate, instead we report the Spearman correlation coefficient,  $r_s$ . Clade-specific correlations were similarly examined, and correlations within the magnoliids were analyzed using linear regressions with their respective  $R^2$  values reported. All analyses were performed in R (; v. 3.1.1; R Core Team 2012).

## Results

$K_{flower}$  varied widely among the species we studied from a mean of 1.30 mmol s<sup>-1</sup> m<sup>-2</sup> MPa<sup>-1</sup> for *Cornus florida* inflorescences to 18.79 mmol s<sup>-1</sup> m<sup>-2</sup> MPa<sup>-1</sup> for *Calycanthus occidentalis* flowers. *C. florida* inflorescences, whose showy organs are bracts, had the lowest  $K_{flower}$  of any species measured. Interestingly, the two magnoliid genera spanned most of the variation in  $K_{flower}$  of all species measured, and  $K_{flower}$  of these two genera were marginally significantly different (averages of 13.84 and 3.18 mmol s<sup>-1</sup> m<sup>-2</sup> MPa<sup>-1</sup> for *Calycanthus* and *Magnolia*, respectively;  $P = 0.05$ ). The monocots varied from 1.71 mmol s<sup>-1</sup> m<sup>-2</sup> MPa<sup>-1</sup> for *Iris douglasiana* to 4.03 mmol s<sup>-1</sup> m<sup>-2</sup> MPa<sup>-1</sup> for *Agapanthus africanus*, while the eudicots ranged from 1.30 mmol s<sup>-1</sup> m<sup>-2</sup> MPa<sup>-1</sup> for *Cornus florida* inflorescences to 3.81 mmol s<sup>-1</sup> m<sup>-2</sup> MPa<sup>-1</sup> for *Paeonia suffruticosa*.

If the abundance of xylem conduits were a major limitation to  $K_{flower}$ , then species with more abundant xylem, whether as veins in petals and tepals or as conduit cross-sectional area in pedicels, should have higher  $K_{flower}$ . In general, xylem traits related to water supply were significantly and

positively correlated with  $K_{flower}$  (Figure 1). There was a significant relationship between  $K_{flower}$  and  $VLA$  ( $r_s = 0.61$ ,  $df = 13$ ,  $P = 0.015$ ), which was best fit by a quadratic relationship ( $RMSE = 1.53$ ,  $df = 12$ ). However, within clades only the magnoliids showed a significant effect of  $VLA$  on  $K_{flower}$  ( $R^2 = 0.93$ ,  $F = 63.88$ ,  $df = 4$ ,  $P = 0.001$ ). There was no significant relationship between  $K_{flower}$  and the Huber ratio ( $P = 0.84$ ), nor between  $VLA$  and Huber ratio ( $P = 0.85$ ; Figure 3).

Water loss traits were also predicted to correlate with  $K_{flower}$ . Consistent with this hypothesis, there was a significant relationship between  $K_{flower}$  and  $g_{min}$  ( $r_s = 0.52$ ,  $df = 12$ ,  $P = 0.05$ ), which was best fit by a quadratic function ( $RMSE = 1.22$ ,  $df = 11$ ; Figure 2a). This relationship was driven predominantly by the large variation in  $g_{min}$  and  $K_{flower}$  among the Calycanthaceae. No relationships between stomatal traits and  $K_{flower}$  were significant, although species with higher stomatal densities (and thus also SPI) tended also to have higher  $K_{flower}$  (Figure 2b-d). It should be noted that leaves have much higher stomatal densities than measured here on flowers; angiosperm leaves range from 100 to 500 stomata per  $mm^2$  of lamina surface area (Sack et al. 2003), while flowers in the present study had no more than 15 stomata per  $mm^2$ . The range of guard cell lengths we measured on flowers (12-32  $\mu m$ ) was consistent with guard cell size recorded for leaves (Sack et al. 2003).

These water loss traits were also predicted to correlate with each other. Stomata represent an open path for liquid water to evaporate from the flower intercellular spaces into the atmosphere, so higher abundances or larger stomata should increase the rate at which flowers lose water, particularly if stomata do not close completely (Hew et al. 1980). However, there was no significant relationship between  $g_{min}$  and stomatal traits (Figure 4a).

Because of the need to maintain water balance, water supply traits and water loss traits were predicted to correlate positively with each other. Indeed, the strongest correlation was between  $g_{min}$  and  $VLA$  ( $r_s = 0.60$ ,  $df = 10$ ,  $P < 0.05$ ), which was best described by a quadratic function ( $RMSE = 6.96$ ,  $df = 9$ ; Figure 5a). The strength of this correlation, combined with the strength of correlation between each of these traits and  $K_{flowers}$ , strengthens the importance of these two water balance traits in influencing floral hydraulic architecture. Within clades, the correlation between  $g_{min}$  and  $VLA$  was significant only for the magnoliids ( $R^2 = 0.88$ ,  $F = 30.82$ ,  $df = 3$ ,  $P = 0.012$ ). No other correlations between water supply and water loss traits were significant (Figure 5b-d).

The hydraulic conductance of flowers is almost as variable as that of leaves (Figure 6). However, most of this variation was due to variation among the magnoliids (the genera *Magnolia* and *Calycanthus* in the current study), which had values of hydraulic conductance even higher than some leaves. Average  $K_{flower}$  of the eudicots was slightly lower than that of the monocots, which was lower

than that of the magnoliids. Thus, most flowers, particularly of the monocots and eudicots, had conductances in the low ends of the distributions for leaves and for stems. Only three species in this combined dataset have had hydraulic conductance values measured for both leaves and flowers, and for all of them  $K_{leaf}$  was higher than  $K_{flower}$  (*Calycanthus floridus* leaves and flowers averaged 13.44 (Nardini & Salleo 2000) and 10.38  $\text{mmol m}^{-2} \text{s}^{-1} \text{MPa}^{-1}$ , respectively, *Magnolia soulangiana* leaves and flowers averaged 7.87 (Nardini & Salleo 2000) and 3.51  $\text{mmol m}^{-2} \text{s}^{-1} \text{MPa}^{-1}$ , respectively, and *Magnolia grandiflora* leaves and flowers averaged 5.86 and 2.62  $\text{mmol m}^{-2} \text{s}^{-1} \text{MPa}^{-1}$  (Feild et al. 2009), respectively).

## Discussion

Maintaining water balance in desiccating environments requires coordination between water supply and water loss. As leaves or flowers transpire water, their water contents and water potentials decline, which drives the movement of water along the soil-plant-atmosphere continuum. In order to maintain turgor and physiological functioning, the capacity to transport liquid phase water should be tightly coordinated with the rates at which water is lost to the atmosphere. In leaves, differences between microenvironments, for example between sun and shade, induce coordinated changes in traits associated with liquid phase and vapor phase conductances to water, lending strong support to the idea that the need to maintain water balance is a critical determinant of leaf structure (Brodribb & Jordan 2011). Although they are much more ephemeral than leaves, flowers must remain turgid to attract pollinators and, as a result, may also need to maintain water balance throughout anthesis. How they do this has been a point of controversy, with some suggesting that water is delivered primarily by the phloem against the xylem water potential gradient (Trolinder et al. 1993; Chapotin et al. 2003) and others showing that water is imported by the xylem (Feild et al. 2009; Feild et al. 2009).

In the present study, we took a different approach to examining variability in the hydraulic capacity of recently opened flowers from a phylogenetically diverse set of species. Our results showed that  $K_{flower}$  is linked to anatomical and physiological traits associated with water supply and loss.  $K_{flower}$  increased significantly with increasing  $VLA$  (Figure 1), suggesting that the xylem is involved in the delivery of liquid water to petals and tepals.  $K_{flower}$  also increased with increasing  $g_{min}$ , suggesting that the capacity for water transport through flowers is coordinated with rates of water loss from them (Figure 2). The coordination between liquid phase water supply and vapor phase

water loss has been characterized for leaves (Brodribb & Jordan 2011), and the present study is, to our knowledge, the first to demonstrate such coordination for flowers (Figure 5). Our results further imply that the monocots and eudicots have minimized the hydraulic costs of flowers by coordinated changes in water balance traits and  $K_{flower}$  (Figure 5). Despite being highly variable, hydraulic conductances of flowers were generally lower than hydraulic conductances for leaves (Figure 6). From the inflorescences of *Cornus florida* to the undifferentiated perianths of monocots, there was remarkable convergence of  $K_{flower}$  across widely divergent morphologies and sizes among the monocots and eudicots.

### *Regulating water loss from flowers*

Rates of water loss from flowers can be affected by physiological processes, as well as morphology and anatomy. More complex, three-dimensional morphologies with overlapping parts would thicken boundary layers and reduce the gross transpiration flux. Our method for measuring  $K_{flower}$  should be immune to boundary layer effects and allow us to elucidate the relationship between structure and function. Although the abundance of stomata both within individual flowers and among species is highly variable, floral stomata, unlike leaf stomata, may be limited in their ability to curtail water loss from flowers (Hew et al. 1980; Teixido & Valladares 2014; Feild et al. 2009). Although there were no significant correlations between stomatal traits and either  $K_{flower}$  or  $g_{min}$ , the abundance and positioning of floral stomata, like foliar stomata (Sack et al. 2003), may nonetheless influence water loss at least over microscopic spatial scales. Compared to leaves, lower stomatal densities on flowers increase the relative importance of the cuticular pathway for water loss, particularly among monocot and eudicot flowers, which had few, if any, stomata (Figure 4). As a result,  $g_{min}$  was a strong predictor of  $K_{flower}$  among species (Figure 2). If it is a general pattern that stomata on monocot and eudicot flowers do not close passively in response to environmental conditions or actively in response to hormonal signaling (Hew et al. 1980; Teixido & Valladares 2014), then floral stomata, when they are present, may represent an open path for uncontrolled water loss. While angiosperm leaves can actively close their stomata to prevent desiccation, floral stomata, even when they do close, seem incapable of significantly curtailing water loss (Hew et al. 1980; Brodribb & McAdam 2011; McAdam & Brodribb 2012; Teixido & Valladares 2014). Stomata provide an open pathway for water inside the flower to evaporate into the atmosphere, and the near absence of stomata from many flowers may be an efficient way to prevent transpiration from tissues incapable of assimilating CO<sub>2</sub>. Thus, the role of stomata in regulating water loss from most flowers

may be not in their capability to close to prevent transpiration but rather in their near absence from many flowers, which forces transpirational losses to be cuticular. In leaves, this cuticular pathway is usually thought to be highly resistant to water loss.

# *Supplying water to flowers*

For both flowers and fruits, there is controversy over the relative roles of the xylem and the phloem in delivering water. The water content of reproductive organs results from a balance between water supply by vascular tissues (xylem and phloem) and water losses to transpiration and possible backflow to the stem. There has been substantially more work aimed at understanding these dynamics in fruits. In various agricultural species, water flow to developing fruits early in development is considered to come predominantly via the xylem, but this contribution diminishes and is surpassed by the phloem contribution later in fruit development (Ho et al. 1987; Lang 1990; Greenspan et al. 1994). However, more recent studies have called into question the idea that the xylem becomes non-functional and that water import later in development is due solely to the phloem (Choat et al. 2009; Windt et al. 2009; Clearwater et al. 2012; Clearwater et al. 2013). Instead, water may be delivered by both xylem and phloem even if the xylem flow declines or fluctuates throughout development.

With comparatively less work done on flowers, the controversy over xylem- and phloem-delivery of water still remains unsolved. While the present study is incapable of determining whether the xylem or the phloem is the predominant source of water to open flowers, our results do suggest a role for the xylem, at least among some species. Among the magnoliids, increasing  $VLA$  had a significant effect on  $K_{flower}$ , while it had little effect on  $K_{flower}$  of the monocots and eudicots. (Figure 1). Increasing  $K_{flower}$  associated with increasing  $VLA$  strongly suggests that xylem is functional, consistent with other studies measuring water potential gradients (Feild et al. 2009; Feild et al. 2009). Interestingly,  $K_{flower}$  was insensitive to changes in  $VLA$  below a threshold of about 4 mm mm<sup>-2</sup> (Figure 1a). The species with  $VLA$  below this threshold were composed predominantly of the monocots and eudicots. In a broader analysis of floral  $VLA$  variation, the vast majority of flowers had  $VLA$  below 4 mm mm<sup>-2</sup>, although species with floral  $VLA$  above 4 mm mm<sup>-2</sup> appear in groups across the angiosperm phylogeny (Roddy et al. 2013). Coincidentally, *Magnolia* species all had  $VLA$  around this threshold 4 mm mm<sup>-2</sup>, and inner whorl and outer whorl tepals of *M. grandiflora* vary both in the direction of their water potential gradients and in  $VLA$ ; inner whorl tepals had an average  $VLA$  of 3.26 mm mm<sup>-2</sup> and water potential gradients indicative of phloem-hydration and outer

whorl tepals had a  $VLA$  of  $5.18 \text{ mm mm}^{-2}$  and water potential gradients indicative of xylem hydration (Feild et al. 2009). These results for different *M. grandiflora* tepals within the same flower further suggest that a threshold  $VLA$  of  $4 \text{ mm mm}^{-2}$  may be important in determining how flowers are hydrated.

The insensitivity of  $K_{flower}$  to  $VLA$  variation among these low  $VLA$  species has two possible implications. First, veins in these species may not conduct water during anthesis, and the predominant source of water for the flower may be delivered by the phloem in response to carbon demand. However, estimates of the water flux that could be delivered by the phloem given estimates of the carbon demand of flowers suggest that the phloem alone cannot supply enough water to meet transpiration (Chapotin et al. 2003). Second, the near absence of stomata on flowers with low  $VLA$  and the low  $g_{min}$  of these flowers may mean that the resistance in the hydraulic pathway between the vein and the epidermis may be so high that the flux rate of water through the veins may be spatially and temporally decoupled from rates of transpiration.  $VLA$ , relative to the distance between vein and stoma has been shown to be optimized for transpiration in leaves (Brodribb et al. 2007; Noblin et al. 2008; Zwieniecki & Boyce 2014). The low  $VLA$  in many flowers suggests that they may not be similarly optimized for supplying water for transpiration and that flowers may not rely on continuous delivery of water by the xylem. Instead, flowers may rely on water imported before anthesis and stored in their hydraulic capacitors. Flowers tend to have higher hydraulic capacitance than leaves (Chapotin et al. 2003), which may functionally isolate them from diurnal water potential variation in the rest of the plant (Trolinder et al. 1993). Further, water stored in hydraulic capacitors may buffer flow rates through veins from rates of transpiration, which may explain why sap flow rates to flowers and inflorescences can be little affected by environmental conditions (Higuchi & Sakuratani 2005; Roddy & Dawson 2012). Given the right conditions, water may flow from flowers back to stems, as has been shown for developing mango fruits (Higuchi & Sakuratani 2006).

There may be a strong phylogenetic component to the tradeoffs among the strategies described here. Our results suggest that variation in how flowers maintain water balance may be associated with coordinated shifts in anatomical and physiological traits. On one end of the spectrum would be species that maintain a high  $K_{flower}$  with high  $VLA$ ,  $g_{min}$ , and stomatal densities. On the other end of the spectrum would be species that have low  $K_{flower}$  due to low  $VLA$ ,  $g_{min}$ , and few or no stomata. The coordination of traits associated with water supply and water loss supports our hypothesis that the maintenance of water balance is fundamental to the functioning of flowers



and highlights, for the first time, that there may be variation in the hydraulic capacity of flowers. Despite the coordination of  $K_{flower}$  with structural and physiological traits, precisely how flowers remain turgid in desiccating microenvironments and the mechanisms of water import to flowers remain unknown. Better characterization of the coordinated shifts in traits associated with evolutionary transitions between the major angiosperm lineages could better elucidate how these strategies may have evolved.

### *Caveats about comparative physiology of non-homologous floral structures*

Measuring floral physiology at the broad phylogenetic scales used in the current study requires comparing non-homologous structures. For example, the showy organs of flowers in our dataset included undifferentiated tepals of the magnoliids and monocots, bracts of *Cornus florida*, and petals of the eudicots (Table 1). Measuring and calculating  $K_{flower}$  and other traits required normalizing flux measurements by an evaporative surface area. In the present study, we chose to normalize by the showy display organs that would be attractive to pollinators responding to visual cues. For these flowers, the showy organs also represent the majority of their evaporative surfaces areas. Yet, other floral organs whose surface areas we did not measure could also contribute to transpirational water losses. While comparing non-homologous structures is not ideal, these structures nonetheless perform similar pollinator functions, which, we believe, warrants their comparison. We are not ruling out the possibility that there may, in fact, be differences between flowers associated with differences in perianth differentiation; indeed, our results suggest that among clades differing in perianth differentiation there is significant variation in hydraulic architecture. Future work could characterize more precisely how floral whorls may differ in hydraulic architecture and function.

### *Conclusions*

Flowers are one of the key innovations of the angiosperms and are incredibly diverse morphologically, yet the physiological costs of flowers can limit the extent to which floral morphology can be molded by pollinator selection. Reducing the physiological costs of flowers would relax constraints on floral form. The diverse monocot and eudicot clades have traits consistent with reduced hydraulic capacity compared to the magnoliids. Reductions in both water loss and water supply among the monocot and eudicot clades may have relaxed physiological constraints on floral morphology and allowed greater lability of morphological traits. While



maintaining water balance may nonetheless be important to flowers, there may be substantial variation among species in how they remain turgid and prevent desiccation. One end of this continuum may be defined by maintaining a high hydraulic conductance to continuously supply water via the xylem, while the other end of the continuum may be defined by the reduction of water loss rates to delay desiccation. Reduced hydraulic conductance and greater reliance on stored water may physiologically separate flowers from diurnal variability in the water status of other plant structures. Better understanding the mechanisms and timing of water transport to flowers and the tradeoffs between the possible mechanisms for maintaining water balance will be an important advancement in our understanding of floral physiology and its interaction with pollinator selection over evolutionary timescales.

## Acknowledgments

We thank P.V.A. Fine, D.D. Baldocchi, and D.D. Ackerly for useful comments on previous drafts of this manuscript, K.A. Simonin for insightful discussions, A. Schürkmann for technical assistance, and H. Forbes for facilitating access to plant material at the U.C. Botanic Garden. This work was funded by grants from the Jepson Herbarium and the Department of Integrative Biology, UC-Berkeley. A.B.R. was supported by a US NSF Graduate Research Fellowship.

## References

- Azad K., Sawa Y., Ishikawa T., Shibata H. (2007) Temperature-dependent stomatal movement in tulip petals controls water transpiration during flower opening and closing. *Annals of Applied Biology* **150**, 81-87.
- Boyce C.K., Brodribb T.J., Feild T.S., Zwieniecki M.A. (2009) Angiosperm leaf vein evolution was physiologically and environmentally transformative. *Proceedings of the Royal Society B* **276**, 1771-1776.
- Bradshaw H.D., Schemske D.W. (2003) Allele substitution at a flower colour locus produces a pollinator shift in monkeyflowers. *Nature* **426**, 176-178.
- Brodribb T.J., Feild T.S. (2010) Leaf hydraulic evolution led a surge in leaf photosynthetic capacity during early angiosperm diversification. *Ecology Letters* **13**, 175-183.
- Brodribb T.J., Feild T.S., Jordan G.J. (2007) Leaf maximum photosynthetic rate and venation are linked by hydraulics. *Plant Physiology* **144**, 1890-1898.
- Brodribb T.J., Jordan G.J. (2011) Water supply and demand remain balanced during leaf acclimation of *Nothofagus cunninghamii* trees. *The New Phytologist* **192**, 437-448.
- Brodribb T.J., Jordan G.J., Carpenter R.J. (2013) Unified changes in cell size permit coordinated leaf evolution. *The New Phytologist* **199**, 559-570.
- Brodribb T.J., McAdam S.A. (2011) Passive origins of stomatal control in vascular plants. *Science* **331**, 582-585.
- Chapotin S.M., Holbrook N.M., Morse S.R., Gutiérrez M.V. (2003) Water relations of tropical dry forest flowers: Pathways for water entry and the role of extracellular polysaccharides. *Plant, Cell & Environment* **26**, 623-630.
- Choat B., Gambetta G.A., Shackel K.A., Matthews M.A. (2009) Vascular function in grape berries across development and its relevance to apparent hydraulic isolation. *Plant Physiology* **151**, 1677-1687.
- Clearwater M.J., Luo Z., Ong S.E., Blattmann P., Thorp T.G. (2012) Vascular functioning and the water balance of ripening kiwifruit (*Actinidia chinensis*) berries. *Journal of Experimental Botany* **63**, 1835-1847.
- Clearwater M.J., Ong S.E.C., Li K.T. (2013) Sap flow and vascular functioning during fruit development. *Acta Horticulturae* **991**, 385-392.
- Darwin C. (1888) *The various contrivances by which orchids are fertilised by insects*. John Murray, London.

494 Feild T.S., Brodribb T.J., Iglesias A., Chatelet D.S., Baresch A., Upchurch G.R., Gomez B., Mohr  
495 B.A., Coiffard C., et al. (2011) Fossil evidence for cretaceous escalation in angiosperm leaf  
496 vein evolution. *Proceedings of the National Academy of Sciences* **108**, 8363-8366.

497 Feild T.S., Chatelet D.S., Brodribb T.J. (2009) Ancestral xerophobia: A hypothesis on the whole  
498 plant ecophysiology of early angiosperms. *Geobiology* **7**, 237-264.

499 Feild T.S., Chatelet D.S., Brodribb T.J. (2009) Giant flowers of southern magnolia are hydrated by  
500 the xylem. *Plant Physiology* **150**, 1587-1597.

501 Feild T.S., Upchurch Jr G.R., Chatelet D.S., Brodribb T.J., Grubbs K.C., Samain M.-S., Wanke S.  
502 (2011) Fossil evidence for low gas exchange capacities for early cretaceous angiosperm  
503 leaves. *Paleobiology* **37**, 195-213.

504 Galen C. (2000) High and dry: Drought stress, sex-allocation trade-offs, and selection on flower size  
505 in the alpine wildflower *Polemonium viscosum* (Polemoniaceae). *The American Naturalist* **156**, 72-  
506 83.

507 Galen C., Sherry R.A., Carroll A.B. (1999) Are flowers physiological sinks or faucets? Costs and  
508 correlates of water use by flowers of *Polemonium viscosum*. *Oecologia* **118**, 461-470.

509 Greenspan M.D., Shackel K.A., Matthews M.A. (1994) Developmental changes in the diurnal water  
510 budget of the grape berry exposed to water deficits. *Plant, Cell & Environment* **17**, 811-820.

511 Gullo M.A.L., Nardini A., Trifilò P., Salleo S. (2005) Diurnal and seasonal variations in leaf hydraulic  
512 conductance in evergreen and deciduous trees. *Tree Physiology* **25**, 505-512.

513 Hew C.S., Lee G.L., Wong S.C. (1980) Occurrence of non-functional stomata in the flowers of  
514 tropical orchids. *Annals of Botany* **46**, 195-201.

515 Higuchi H., Sakuratani T. (2005) The sap flow in the peduncle of the mango (*Mangifera indica* L.)  
516 inflorescence as measured by the stem heat balance method. *Journal of the Japanese Society of*  
517 *Horticultural Science* **74**, 109-114.

518 Higuchi H., Sakuratani T. (2006) Water dynamics in mango (*Mangifera indica* L.) Fruit during the  
519 young and mature fruit seasons as measured by the stem heat balance method. *Journal of the*  
520 *Japanese Society for Horticultural Science* **75**, 11-19.

521 Ho L.C., Grange R.I., Picken A.J. (1987) An analysis of the accumulation of water and dry matter in  
522 tomato fruit. *Plant, Cell & Environment* **10**, 157-162.

523 Hopkins R., Rausher M.D. (2012) Pollinator-mediated selection on flower color allele drives  
524 reinforcement. *Science* **335**, 1090-1092.

525 Kerstiens G. (1996) Cuticular water permeability and its physiological significance. *Journal of*  
526 *Experimental Botany* **47**, 1813-1832.

527 Kolb K.J., Sperry J.S., Lamont B.B. (1996) A method for measuring xylem hydraulic conductance  
528 and embolism in entire root and shoot systems. *Journal of Experimental Botany* **47**, 1805-1810.

529 Lambrecht S.C. (2013) Floral water costs and size variation in the highly selfing *Leptosiphon bicolor*  
530 (*polemoniaceae*). *International Journal of Plant Sciences* **174**, 74-84.

531 Lambrecht S.C., Dawson T.E. (2007) Correlated variation of floral and leaf traits along a moisture  
532 availability gradient. *Oecologia* **151**, 574-583.

533 Lang A. (1990) Xylem, phloem and transpiration flows in developing apple fruits. *Journal of*  
534 *Experimental Botany* **41**, 645-651.

535 Lersten N.R., Wemple D.K. (1966) The discontinuity plate, a definitive floral characteristic of the  
536 Psoraleae (Leguminosae). *American Journal of Botany* 548-555.

537 McAdam S.A.M., Brodribb T.J. (2012) Stomatal innovation and the rise of seed plants. *Ecology letters*  
538 **15**, 1-8.

539 Münch E. (1930) *Die Stoffbewegungen in der Pflanze*. Gustav Fischer, Jena, Germany.

540 Nardini A., Gortan E., Salleo S. (2005) Hydraulic efficiency of the leaf venation system in sun- and  
541 shade-adapted species. *Functional Plant Biology* **32**, 953.

542 Nardini A., Salleo S. (2000) Limitation of stomatal conductance by hydraulic traits: Sensing or  
543 preventing xylem cavitation? *Trees* **15**, 14-24.

544 Nobel P.S. (1983) *Biophysical Plant Physiology and Ecology*. W.H. Freeman, San Francisco.

545 Noblin X., Mahadevan L., Coomaraswamy I.A., Weitz D.A., Holbrook N.M., Zwieniecki M.A.  
546 (2008) Optimal vein density in artificial and real leaves. *Proceedings of the National Academy of*  
547 *Sciences* **105**, 9140-9144.

548 Pittermann J. (2010) The evolution of water transport in plants: An integrated approach. *Geobiology* **8**,  
549 112-139.

550 Rasband W.S. (2012) <<http://imagej.nih.gov/ij/>> Bethesda, MD, USA: National Institutes of  
551 Health.

552 R Core Team. (2012) <<http://www.R-project.org/>> Vienna, Austria: R Foundation for Statistical  
553 Computing.

554 Roddy A.B., Dawson T.E. (2012) Determining the water dynamics of flowering using miniature sap  
555 flow sensors. *Acta Horticulturae* **951**, 47-53.

- Roddy A.B., Guilliams C.M., Lilitham T., Farmer J., Wormser V., Pham T., Fine P.V.A., Feild T.S., Dawson T.E. (2013) Uncorrelated evolution of leaf and petal venation patterns across the angiosperm phylogeny. *Journal of Experimental Botany* **64**, 4081-4088.
- Sack L., Cowan P.D., Jaikumar N., Holbrook N.M. (2003) The hydrology of leaves: Co-ordination of structure and function in temperate woody species. *Plant, Cell & Environment* **26**, 1343-1356.
- Sack L., Frole K. (2006) Leaf structural diversity is related to hydraulic capacity in tropical rain forest trees. *Ecology* **87**, 483-491.
- Sack L., Melcher P.J., Zwieniecki M.A., Holbrook N.M. (2002) The hydraulic conductance of the angiosperm leaf lamina: A comparison of three measurement methods. *Journal of Experimental Botany* **53**, 2177-2184.
- Scoffoni C., Pou A., Aasamaa K., Sack L. (2008) The rapid light response of leaf hydraulic conductance: New evidence from two experimental methods. *Plant, Cell & Environment* **31**, 1803-1812.
- Sprengel C.K. (1793) *Das entdeckte Geheimnis der Natur im Bau und in der Befruchtung der Blumen*. Friedrich Vieweg dem aeltern, Berlin.
- Strauss S.Y., Whittall J.B. (2006) Non-pollinator agents of selection on floral traits. In: *Ecology and Evolution of Flowers*. pp. 120-138. Oxford: Oxford University Press.
- Teixido A.L., Valladares F. (2014) Disproportionate carbon and water maintenance costs of large corollas in hot mediterranean ecosystems. *Perspectives in Plant Ecology, Evolution and Systematics* **16**, 83-92.
- Trolinder N.L., McMichael B.L., Upchurch D.R. (1993) Water relations of cotton flower petals and fruit. *Plant, Cell & Environment* **16**, 755-760.
- Whittall J.B., Hodges S.A. (2007) Pollinator shifts drive increasingly long nectar spurs in columbine flowers. *Nature* **447**, 706-709.
- Windt C.W., Gerkema E., Van As H. (2009) Most water in the tomato truss is imported through the xylem, not the phloem: A nuclear magnetic resonance flow imaging study. *Plant Physiology* **151**, 830-842.
- Zwieniecki M.A., Boyce C.K. (2014) Evolution of a unique anatomical precision in angiosperm leaf venation lifts constraints on vascular plant ecology. *Proceedings of the Royal Society B* **281**, 20132829.

# Figure legends

Figure 1. Coordination between whole flower hydraulic conductance ( $K_{flower}$ ) and water supply traits: (a) vein length per area ( $VLA$ ; or vein density) and (b) the ratio of xylem cross-sectional area to evaporative surface area (Huber ratio). Dashed lines indicate curve fits for all species, and solid lines indicate linear fits for the magnoliids only. All points include error bars, some of which may be smaller than the points themselves.

Figure 2. Coordination between  $K_{flower}$  and water loss traits: (a) minimum epidermal conductance ( $g_{min}$ ), (b) stomatal density, (c) stomatal length, (d) stomatal pore area index (SPI). Dashed lines indicate curve fits for all species, and solid lines indicate linear fits for the magnoliids only. Point symbols are the same as in Figure 1. All points include error bars, some of which may be smaller than the points themselves.

Figure 3. Lack of correlation among the water supply traits,  $VLA$  and Huber ratio.

Figure 4. Correlations between  $g_{min}$  and (a) stomatal pore area index (SPI) and (b) stomatal density. Statistically significant curve fits are shown. Point symbols are the same as in Figure 1.

Figure 5. Coordination between water supply traits ( $VLA$  and Huber ratio) and water loss traits ( $g_{min}$  and SPI). Statistically significant relationships are shown with curve fits and correlation coefficients. Dashed lines indicate curve fits for all species, and solid lines indicate linear fits for the magnoliids only. Point symbols are the same as in Figure 1. All points include error bars, some of which may be smaller than the points themselves.

Figure 6. Variation among plant structures in hydraulic conductance normalized by the single-sided evaporative surface area (i.e. total leaf or flower area). Groupings were chosen to highlight the major differences within structures. Values below the bars indicate the number of species sampled in each group. Data for flowers are from the current study and Feild et al. {Feild 2009}; for tropical leaves are from Sack and Frole {Sack 2006}; for temperate leaves from Nardini and Salleo {Nardini 2000}, Sack et al. {Sack 2002}, Nardini et al. {Nardini 2005}, Lo Gullo et al. {Gullo 2005}, Scoffoni et al. {Scoffoni 2008}, Simonin et al. {Simonin 2012}.

623 Figure 1

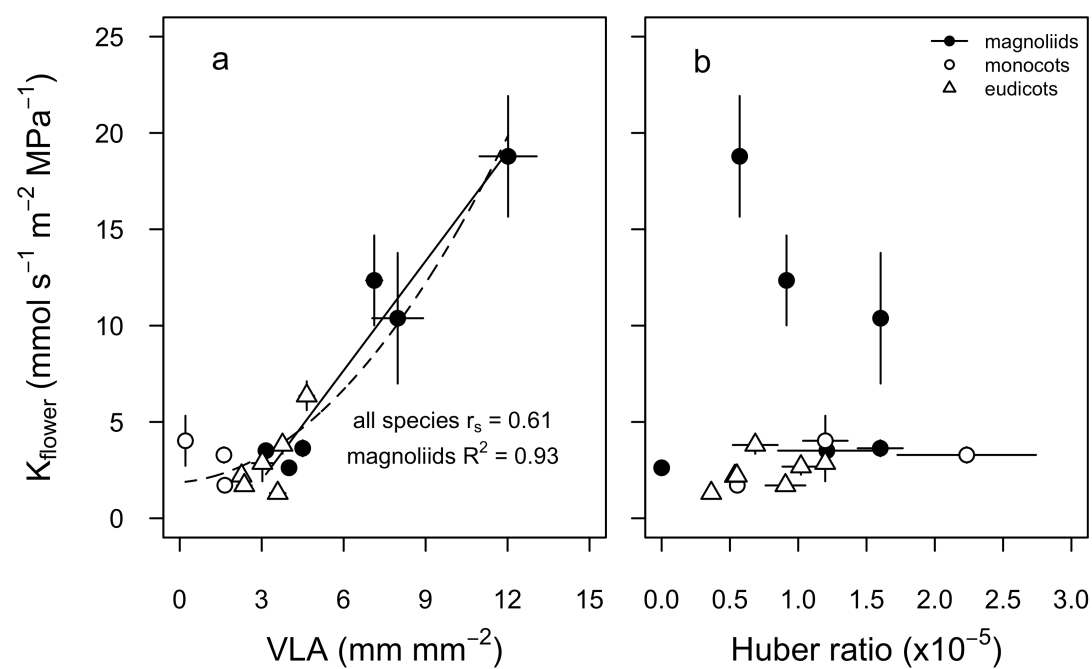



624     Figure 2

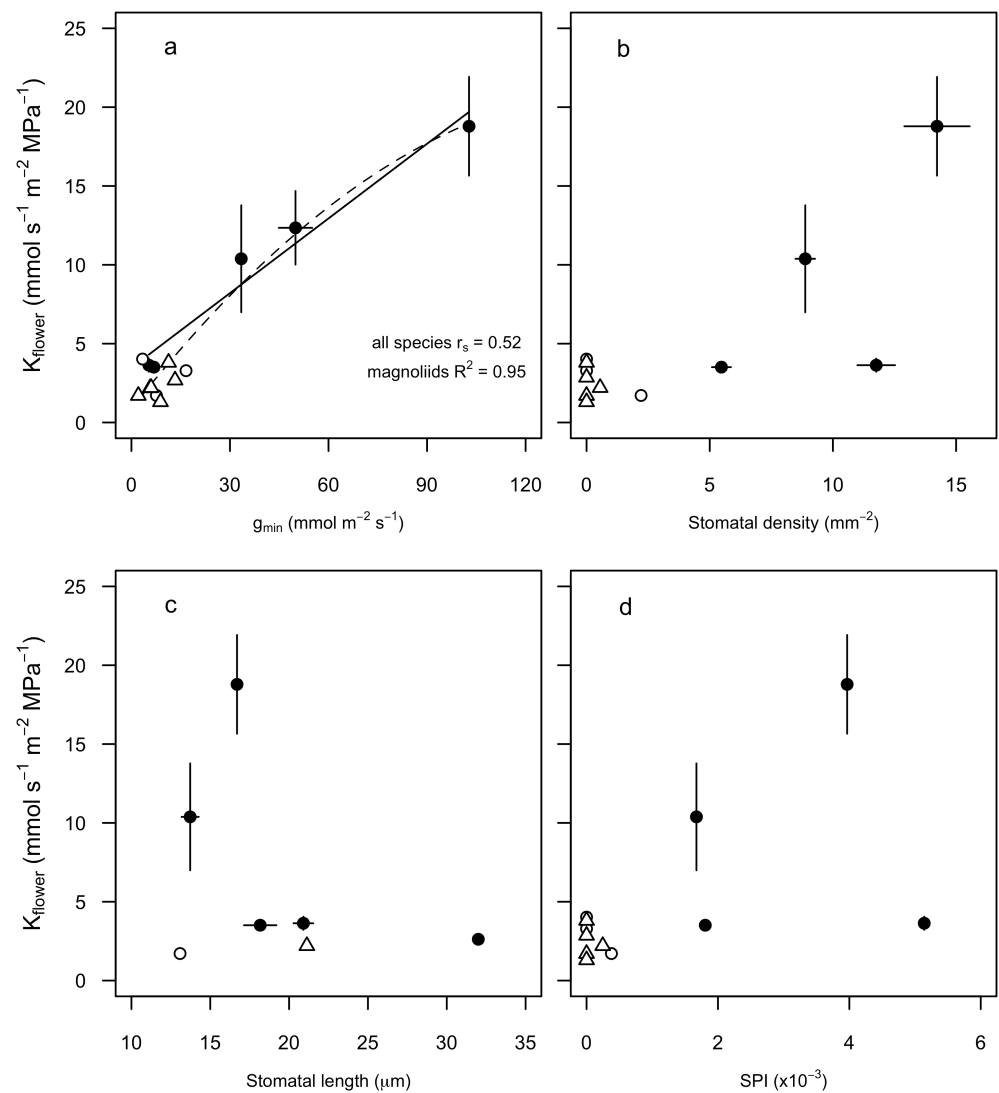

625 Figure 3

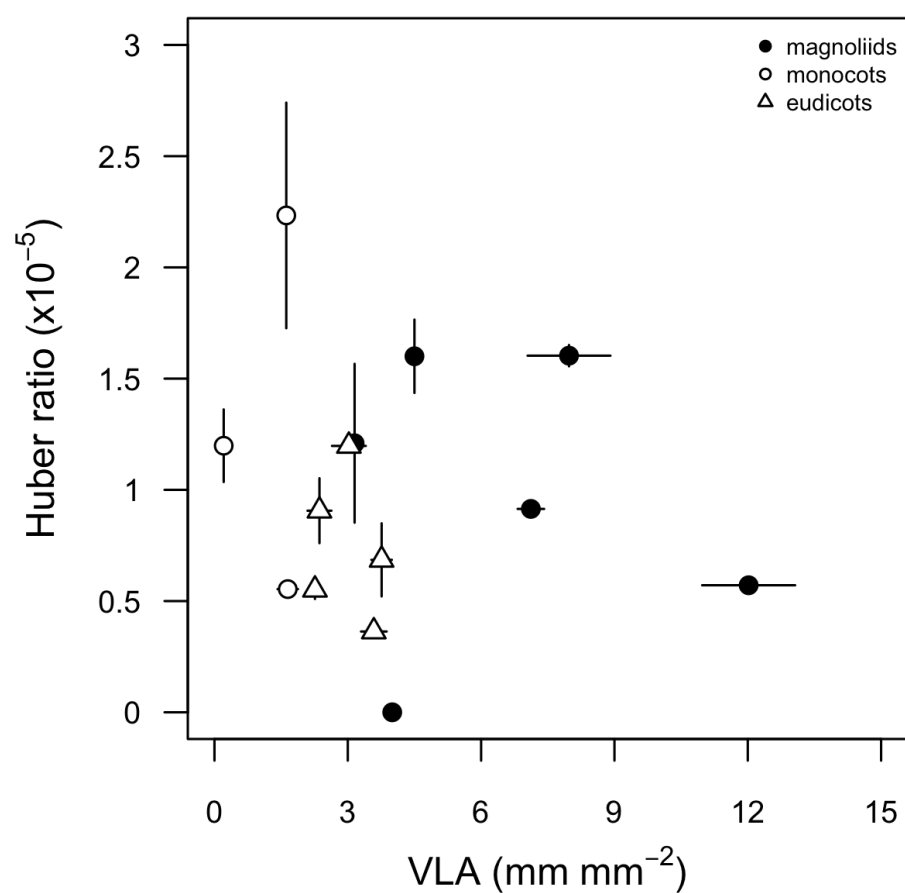

Figure 4

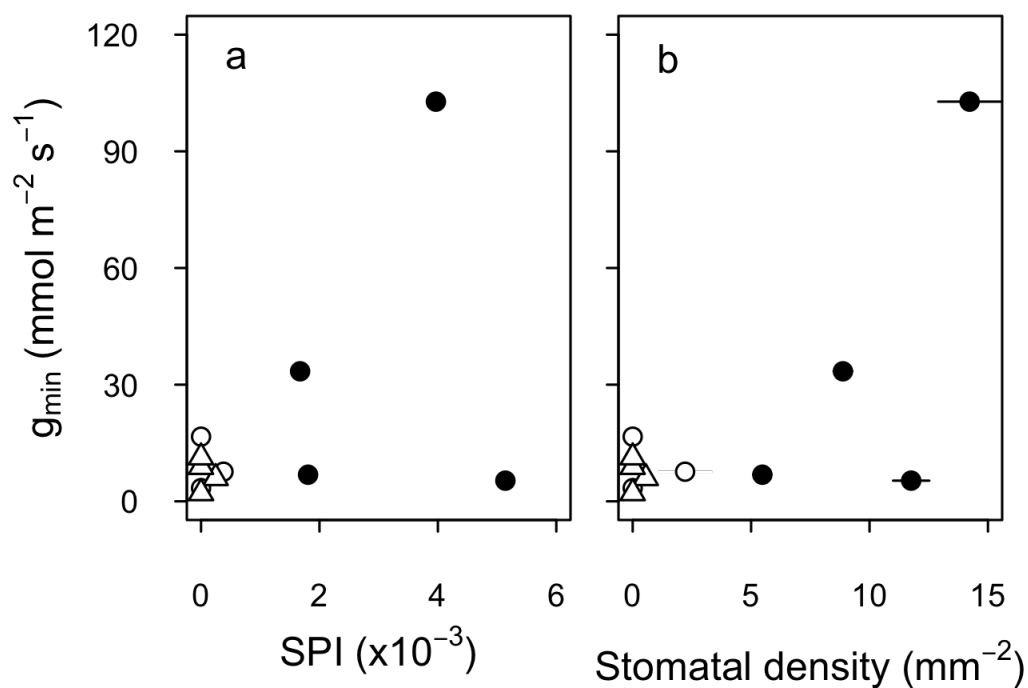

629     Figure 5

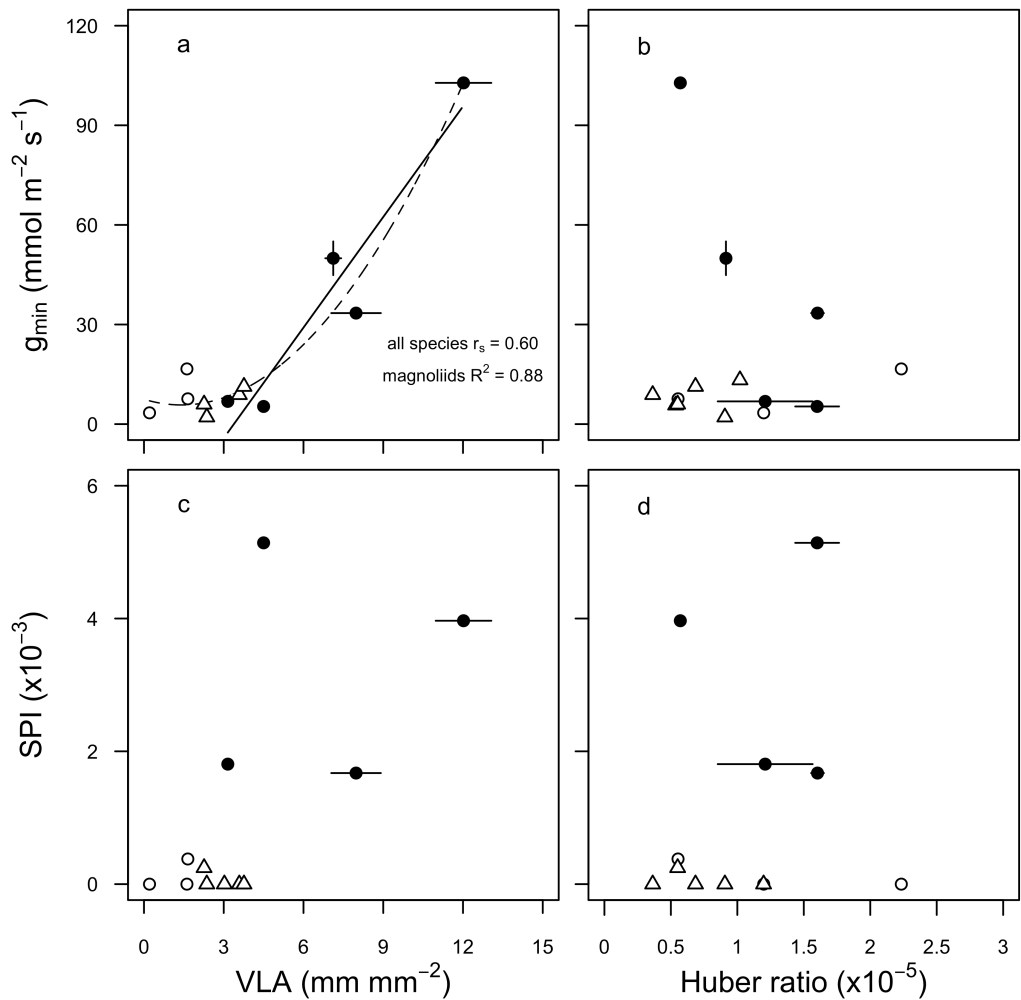

Figure 6

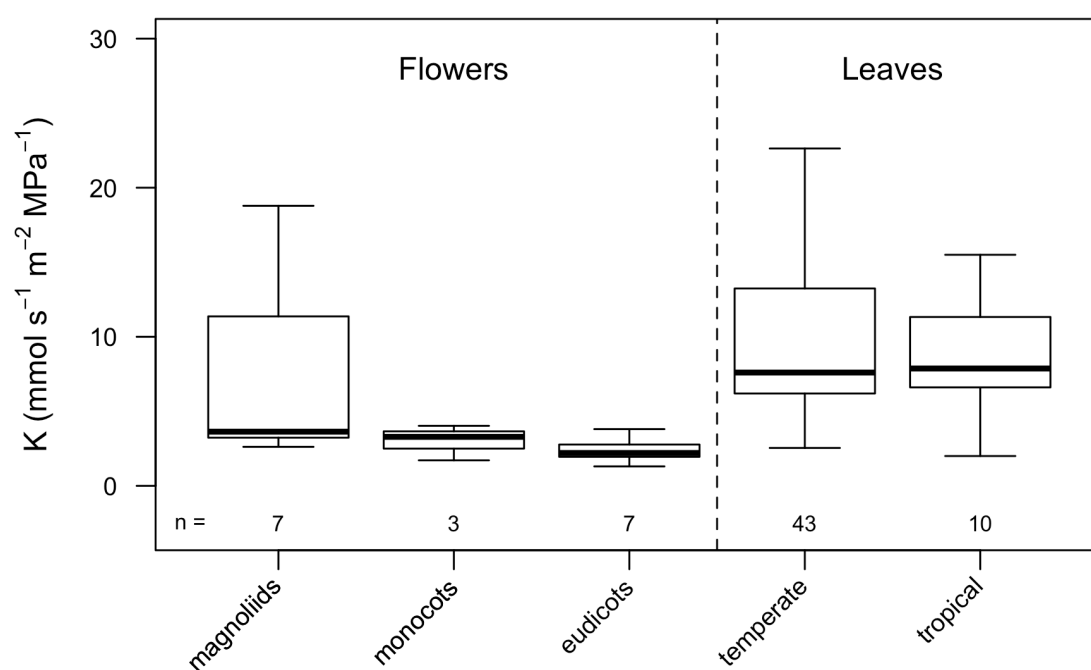

Table 1. List of species used in the current study and some structural and morphological traits.

| Species                           | Family           | Area<br>( $\times 10^{-3} \text{ m}^2$ ) | Mass<br>per area<br>( $\times 10^{-3} \text{ g cm}^{-2}$ ) | Perianth<br>differentiation       | Corolla<br>fusion | n  | $k_{\text{flower}}$<br>( $\text{mmol m}^{-2} \text{ s}^{-1} \text{ MPa}^{-1}$ ) |
|-----------------------------------|------------------|------------------------------------------|------------------------------------------------------------|-----------------------------------|-------------------|----|---------------------------------------------------------------------------------|
| <i>Agapanthus africanus</i>       | Amaryllidaceae   | 1.07                                     | 2.63                                                       | monochlamydous                    | fused             | 4  | 4.02                                                                            |
| <i>Amphilophium buccinatorium</i> | Bignoniaceae     | 6.95                                     | 7.73                                                       | dichlamydeous                     | fused             | 4  | 2.68                                                                            |
| <i>Calycanthus chinensis</i>      | Calycanthaceae   | 9.08                                     | 4.86                                                       | graded tepals<br>(monochlamydous) | unfused           | 7  | 12.34                                                                           |
| <i>Calycanthus floridus</i>       | Calycanthaceae   | 2.53                                     | 5.68                                                       | graded tepals<br>(monochlamydous) | unfused           | 4  | 10.38                                                                           |
| <i>Calycanthus occidentalis</i>   | Calycanthaceae   | 4.91                                     | 15.42                                                      | graded tepals<br>(monochlamydous) | unfused           | 5  | 18.79                                                                           |
| <i>Camellia yunnanensis</i>       | Theaceae         | 4.92                                     | NA                                                         | dichlamydeous                     | unfused           | 5  | 2.86                                                                            |
| <i>Cornus florida</i>             | Cornaceae        | 4.76                                     | 1.87                                                       | dichlamydeous                     | unfused           | 3  | 1.31                                                                            |
| <i>Hemerocallis sp.</i>           | Xanthorrhoeaceae | 13.43                                    | 4.65                                                       | monochlamydous                    | unfused           | 10 | 3.29                                                                            |
| <i>Iris douglasiana</i>           | Iridaceae        | 5.30                                     | 1.88                                                       | monochlamydous                    | unfused           | 5  | 1.71                                                                            |
| <i>Magnolia doltsopa</i>          | Magnoliaceae     | 22.69                                    | NA                                                         | monochlamydous                    | unfused           | 4  | 2.95                                                                            |
| <i>Magnolia grandiflora</i>       | Magnoliaceae     | 45.0                                     | 5.3                                                        | monochlamydous                    | unfused           | NA | 2.62                                                                            |
| <i>Magnolia soulangiana</i>       | Magnoliaceae     | 24.44                                    | 2.58                                                       | monochlamydous                    | unfused           | 13 | 3.50                                                                            |
| <i>Magnolia stellata</i>          | Magnoliaceae     | 11.07                                    | 2.00                                                       | monochlamydous                    | unfused           | 6  | 3.63                                                                            |
| <i>Paeonia suffruticosa</i>       | Paeoniaceae      | 80.45                                    | 3.57                                                       | dichlamydeous                     | unfused           | 4  | 3.81                                                                            |

| Species                           | Family    | Area<br>( $\times 10^{-3} \text{ m}^2$ ) | Mass<br>per area<br>( $\times 10^{-3} \text{ g cm}^{-2}$ ) | Perianth<br>differentiation | Corolla<br>fusion | n | $k_{\text{flower}}$<br>( $\text{mmol m}^{-2} \text{ s}^{-1} \text{ MPa}^{-1}$ ) |
|-----------------------------------|-----------|------------------------------------------|------------------------------------------------------------|-----------------------------|-------------------|---|---------------------------------------------------------------------------------|
| <i>Rhododendron johnstoneanum</i> | Ericaceae | 4.52                                     | 2.20                                                       | dichlamydeous               | fused             | 4 | 2.21                                                                            |
| <i>Rhododendron loderi</i>        | Ericaceae | 16.08                                    | 1.96                                                       | dichlamydeous               | fused             | 4 | 2.19                                                                            |
| <i>Rhododendron protistum</i>     | Ericaceae | 8.24                                     | 2.92                                                       | dichlamydeous               | fused             | 5 | 1.71                                                                            |

635  
636  
637  
638
